# Supplementary material
Source: publisher figshare collection journal article supplement (https://acs.figshare.com/ndownloader/files/6994367)
Supplement: Supplementary file 1 [file 6994367]

## Supporting Information

### **Nano- and microstructure engineering: an effective method for creating high efficiency magnesium silicide based thermoelectrics**

**Nader Farahi,<sup>a</sup> Sagar Prabhudev,<sup>b</sup> Gianluigi A. Botton,<sup>b</sup> James R. Salvador,<sup>c</sup> Holger**

**Kleinke\*<sup>a</sup>**

*<sup>a</sup> Department of Chemistry and Waterloo Institute for Nanotechnology, University of Waterloo, Waterloo, ON, Canada N2L 3G1*

*<sup>b</sup> Materials Science and Engineering Department, McMaster University, Hamilton, ON, Canada L8S 4L8*

*<sup>c</sup> General Motors Research & Development Center, Warren, MI, USA 48154*

Email: [kleinke@uwaterloo.ca](mailto:kleinke@uwaterloo.ca)

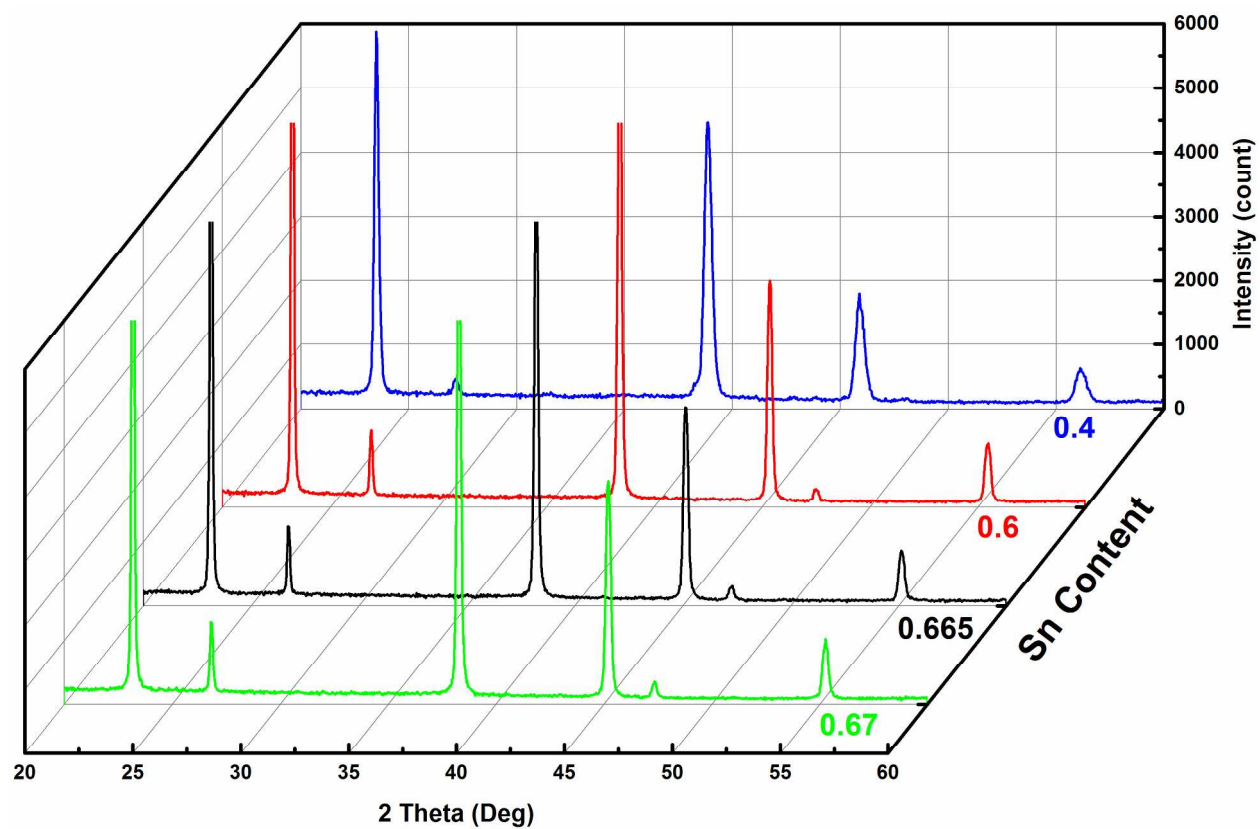

**Fig. S1.** Powder X-ray diffraction patterns of  $\text{Mg}_2\text{Si}_{1-x-y}\text{Sn}_x\text{Bi}_y$  solid solutions.

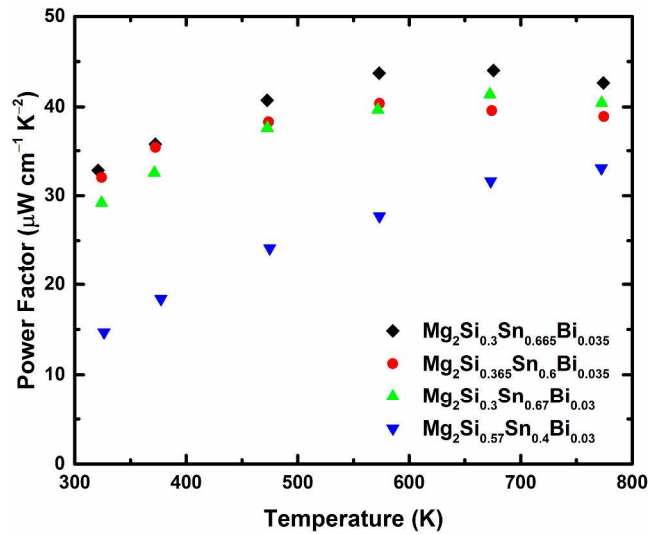

**Fig. S2.** Power factor of the  $\text{Mg}_2\text{Si}_{1-x-y}\text{Sn}_x\text{Bi}_y$  solid solutions.

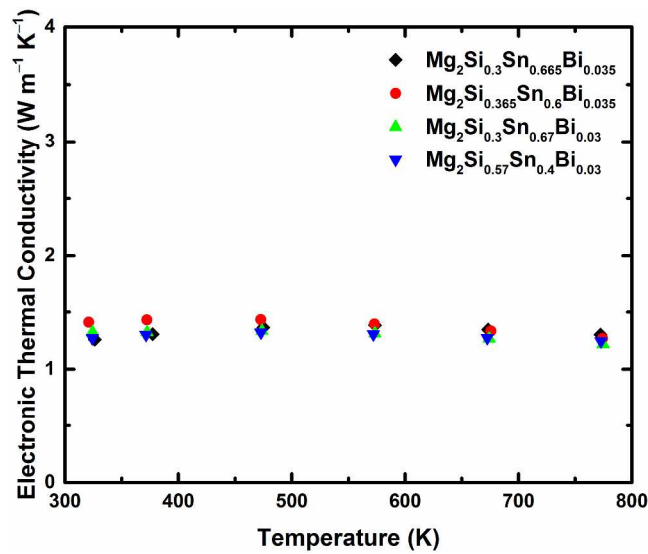

**Fig. S3.** Electronic thermal conductivity of the  $\text{Mg}_2\text{Si}_{1-x-y}\text{Sn}_x\text{Bi}_y$  solid solutions.

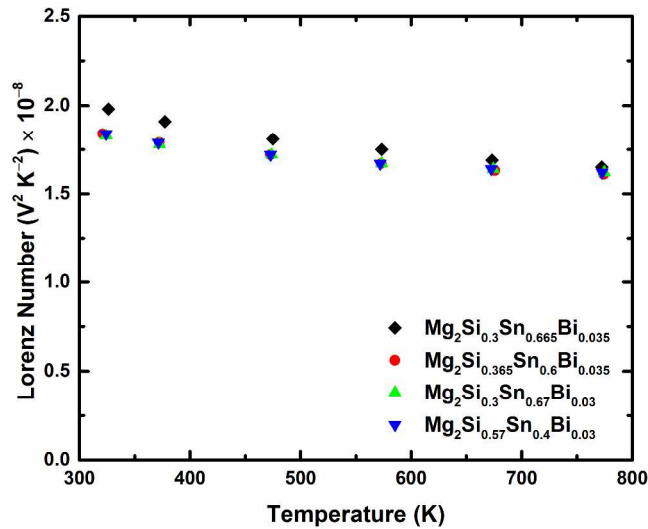

**Fig. S4.** Calculated Lorenz numbers between 300 K and 800 K of the  $Mg_2Si_{1-x}Sn_xBi_y$  solid solutions.

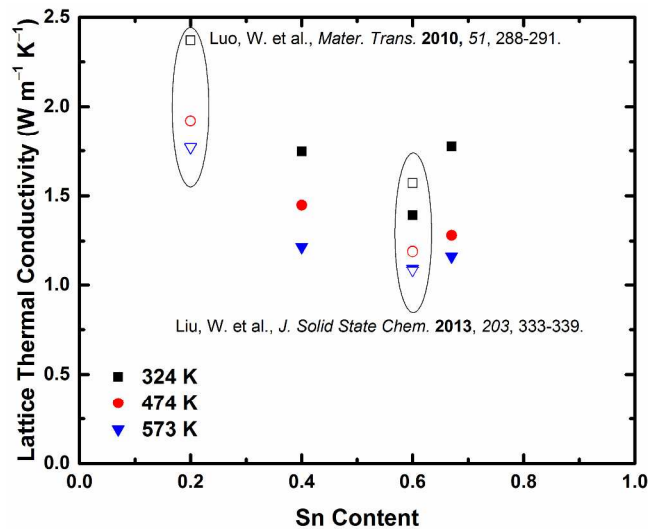

**Fig. S5.** Lattice thermal conductivity of all samples with respect to Sn content including the reported values for Bi doped  $Mg_2Si_{0.8}Sn_{0.2}$  and  $Mg_2Si_{0.4}Sn_{0.6}$  samples.

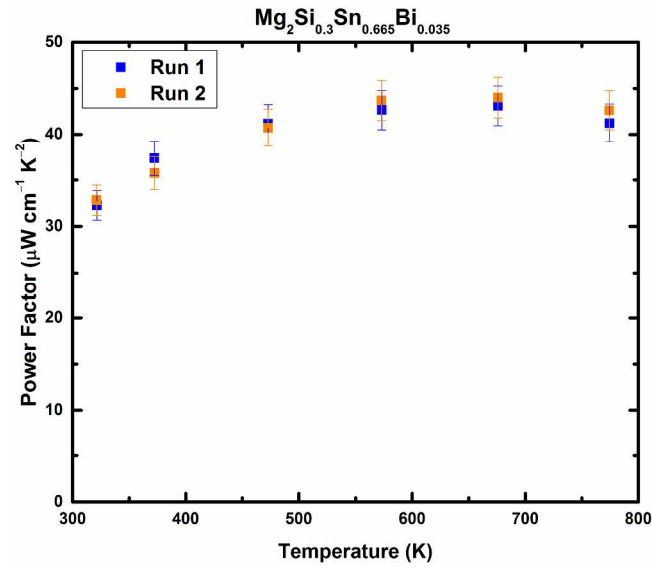

**Fig. S6.** Power factor of  $\text{Mg}_2\text{Si}_{0.3}\text{Sn}_{0.665}\text{Bi}_{0.035}$  for two consecutive measurements.

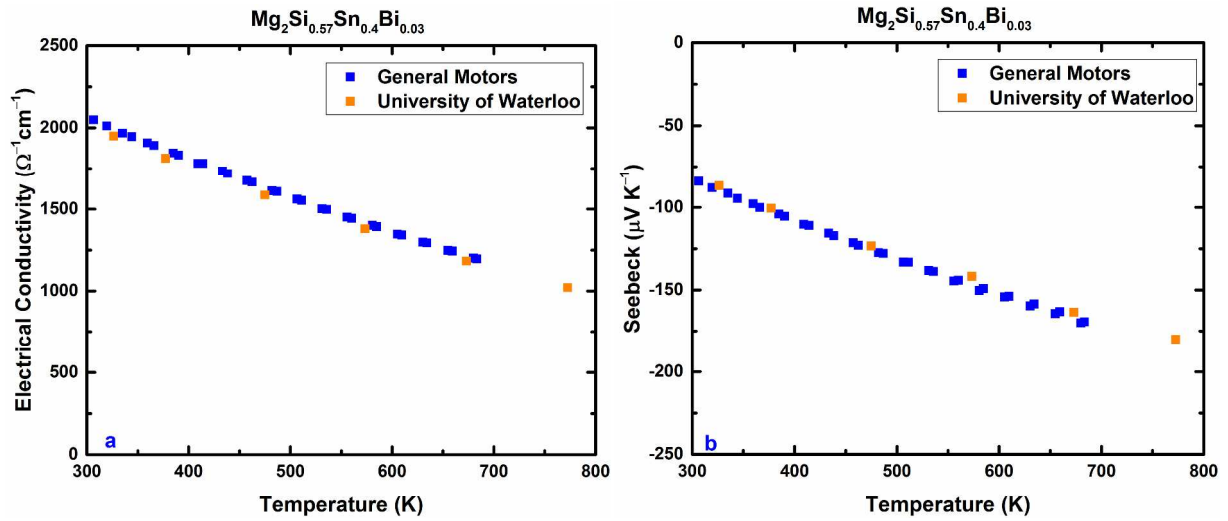

**Fig. S7.** Electrical conductivity (a) and Seebeck coefficient (b) of  $\text{Mg}_2\text{Si}_{0.57}\text{Sn}_{0.4}\text{Bi}_{0.03}$  measured at University of Waterloo and General Motors laboratory to examine the consistency of the data.
